# Supplementary material for: Detection of synovial sepsis in horses using enzymes as biomarkers
Source: PubMed Central journal article supplement — Equine Vet J. 2021 Jun 15;54(3):513–22. doi: 10.1111/evj.13459 (PMC9290786; doi:10.1111/evj.13459), 2021-06-15
Supplement: EVJ-54-513-s001.pdf [file EVJ-54-513-s001.pdf]

**Table S1:** See legend at foot of table on page 5.

|    | A   | B             | C    | D                               | E                                        | F                     | G                | H                    | I                     | J                     | K                | L           | M        | N        | O |
|----|-----|---------------|------|---------------------------------|------------------------------------------|-----------------------|------------------|----------------------|-----------------------|-----------------------|------------------|-------------|----------|----------|---|
| 1  | No. | Breed         | Age  | Synovial structure              | Cause of septic synovitis/Diagnosis      | AAEP lameness         | Serum SAA (mg/l) | Synovia macroscopic  | Synovial WBC/ $\mu$ l | Synovial neutrophil % | Synovial TP g/dl | PCR pos/neg | LYS U/ml | MPO U/ml |   |
| 2  | 1   | Shire         | 3 y  | tarsocrural joint R             | Iatrogenic, following joint treatment    | 5/5 RH                | 3921             | turbid               | 75580                 | 96                    | 4.1              | pos.        | 2446.64  | 5.520    |   |
| 3  | 2   | Quarter Horse | 10 y | tarsocrural joint R             | Traumatic, multiple lacerations          | stiff, post traumatic | 381.4            | hemor.               | ~2000                 | 90                    | nd               | pos.        | 1451.07  | 3.651    |   |
| 4  | 3   | Warmblood     | 14 d | lateral femoro- tibial joint R  | Hematogenous, sepsis                     | 3/5 RH                | 1959             |                      | ~9000                 | 85                    | 3.2              | pos.        | 1005.52  | 0.276    |   |
| 5  | 4   | Warmblood     | 14 d | femoropatellar joint R          | Hematogenous, sepsis                     | 3/5 RH                | 1959             |                      | ~7000                 | 85                    | 3                | pos.        | 1438.50  | 0.925    |   |
| 6  | 5   | Haflinger     | 26 y | antebrachio- carpal joint R     | Idiopathic/ hemat. (ear infection)       | 4/5 RF                | 2173.5           | turbid, orange       | 49230                 | 99                    | 7                | pos.        | 1786.48  | 2.726    |   |
| 7  | 6   | Quarter Horse | 19 d | tarsocrural joint L             | Hematogenous, sepsis                     | 0/5                   | 1561.5           | turbid, orange       | 26150                 | 82                    | nd               | pos.        | 1058.82  | 0.086    |   |
| 8  | 7   | Arabian       | 17 y | digital flexor tendon sheath LH | Traumatic, foot laceration               | 4/5 LH                | 2738.5           | hemor.               | ~20000                | 95                    | nd               | pos.        | 1541.38  | 0.100    |   |
| 9  | 8   | Warmblood     | 15 d | tarsocrural joint L             | Hematogenous, sepsis                     | 4/5 LH                | 756.5            | turbid, yellow       | 44900                 | >95                   | 3                | nd          | 1515.51  | 0.416    |   |
| 10 | 9   | Warmblood     | 11 y | digital flexor tendon sheath RH | Traumatic                                | 4/5 RH                | nd               | turbid, red/orange   | 94600                 | >90                   | 4.1              | pos.        | 1676.31  | 2.327    |   |
| 11 | 10  | Warmblood     | 10 y | tarsocrural joint R             | Iatrogenic                               | 4/5 RH                | 1017.4           | turbid, yellow       | 102120                | 95                    | nd               | pos.        | 1555.97  | 0.207    |   |
| 12 | 11  | Warmblood     | 16 y | metacarpo- phalangeal joint I   | Idiopathic/hemat., severe cellulitis I F | 4/5 FL                | 1653             | turbid, yellow       | 190330*               | >95                   | 5.3              | pos.        | 2135.82  | 2.594    |   |
| 13 | 12  | Warmblood     | 3 y  | femoropatellar joint L          | Idiopathic/hemat. (scirrhous cord)       | 4/5 LH                | 3640.4           | hemor., red, viscos. | ~3000                 | 91                    | nd               | nd          | 1282.51  | 1.222    |   |
| 14 | 13  | Thoroughbred  | 2 y  | femoropatellar joint L          | Traumatic, laceration                    | 5/5 LH                | 3660.6           | turbid, yellow       | ~9600*                | >95                   | 5.4              | nd          | 1051.49  | 1.813    |   |
| 15 | 14  | Warmblood     | 10 y | digital flexor tendon sheath RH | Traumatic, laceration                    | 4/5 RH                | 7179.4           | turbid, purulent     | ~60000*               | 94                    | nd               | pos.        | 38263.92 | 110.112  |   |
| 16 | 15  | Standardbred  | 10 y | tarsocrural joint R             | Idiopathic                               | 3/5 RH                | 410.8            | turbid, yellow       | 78170                 | >95                   | 6                | pos.        | 1163.40  | 6.424    |   |
| 17 | 16  | Standardbred  | 10 y | tarsocrural joint R             | Idiopathic                               | 2/5 RH                | 77               | hemor.               | 30740                 | 97                    | 6.2              | pos.        | 1852.03  | 0.238    |   |

Synovitis Group

|    | A      | B   | C             | D    | E                                  | F                                   | G             | H                | I                   | J                     | K                     | L                | M           | N        | O        |
|----|--------|-----|---------------|------|------------------------------------|-------------------------------------|---------------|------------------|---------------------|-----------------------|-----------------------|------------------|-------------|----------|----------|
| 1  |        | No. | Breed         | Age  | Synovial structure                 | Cause of septic synovitis/Diagnosis | AAEP lameness | Serum SAA (mg/l) | Synovia macroscopic | Synovial WBC/ $\mu$ l | Synovial neutrophil % | Synovial TP g/dl | PCR pos/neg | LYS U/ml | MPO U/ml |
| 18 | Septic | 17  | Standardbred  | 10 y | tarsocural joint R                 | Idiopathic                          | 2/5 RH        | <10              | turbid, yellow      | 96000                 | 99                    | 6                | pos.        | 1584.36  | 4.405    |
| 19 |        | 18  | Standardbred  | 10 y | tarsocural joint R                 | Idiopathic                          | 2/5 RH        | nd               | turbid, red/orange  | 31440                 | >95                   | 5                | nd          | 6082.50  | 7.477    |
| 20 |        | 19  | Warmblood     | 21 y | cubital joint R                    | Traumatic, laceration               | 2/5 RF        | nd               | turbid, yellow      | 136000                | 95                    | nd               | pos.        | 18500.48 | 6.505    |
| 21 |        | 20  | Cob           | 12 d | femoropatellar joint L             | Hematogenous, sepsis                | 3/5 LH        | >4700            | turbid, yellow      | 104090                | 83                    | 5.4              | pos.        | 5386.47  | 5.372    |
| 22 |        | 21  | Pony          | 7 y  | tarsocural joint L                 | Traumatic, laceration               | 3/5 LH        | 3160.7           | hemor.              | 6940                  | 94                    | 3.4              | nd          | 998.59   | 3.644    |
| 23 |        | 22  | Warmblood     | 26 d | tarsocural joint R                 | Hematogenous, sepsis                | 3/5 RH        | 3649.5           | turbid, yellow      | 122000                | 90                    | nd               | nd          | 1093.36  | 0.150    |
| 24 |        | 23  | Warmblood     | 5 y  | femoropatellar joint L             | latrogenic                          | 4/5 LH        | >4357,3          | turbid, yellow      | 46890                 | 90                    | nd               | pos.        | 1352.38  | 4.337    |
| 25 |        | 24  | Warmblood     | 5 y  | femoropatellar joint L             | latrogenic                          | 3/5 LH        | >4550            | turbid, yellow      | ~6000                 | 87                    | nd               | pos.        | 5750.97  | 9.419    |
| 26 |        | 25  | Warmblood     | 7 y  | tarsal sheath R                    | Traumatic, laceration               | 2/5 RH        | 1336             | turbid, red/orange  | >10000                | 90                    | nd               | pos.        | 6330.82  | 15.579   |
| 27 |        | 26  | Paint         | 3 y  | proximal inter-phalangeal joint LH | Traumatic, laceration               | 3/5 LH        | 1562             | turbid, yellow      | 38020                 | 50                    | 5                | nd          | 1392.58  | 0.639    |
| 28 |        | 27  | Quarter Horse | 16 y | tarsocural joint R                 | Idiopathic                          | 5/5 RH        | <10              |                     | 39300                 | 90                    | 4.2              | pos.        | 1409.98  | 3.729    |
| 29 |        | 28  | Quarter Horse | 17 y | tarsocural joint R                 | Idiopathic                          | 2/5 RH        | nd               | red. visc.          | ~ 15000*              | >95                   | nd               | pos.        | 762.60   | 1.487    |
| 30 |        | 29  | Quarter Horse | 18 y | tarsocural joint R                 | Idiopathic                          | 0/5           | 1949             | turbid, orange      | 11490                 | 94                    | 4.6              | pos.        | 1124.27  | 2.952    |
| 31 |        | 30  | Quarter Horse | 19 y | tarsocural joint R                 | Idiopathic                          | 0/5           | 1164             | turbid, yellow      | 3870                  | 89                    | 5                | pos.        | 1006.69  | 1.475    |

|    | A | B   | C             | D    | E                                | F                                          | G             | H                | I                   | J                     | K                     | L                | M           | N        | O        |
|----|---|-----|---------------|------|----------------------------------|--------------------------------------------|---------------|------------------|---------------------|-----------------------|-----------------------|------------------|-------------|----------|----------|
| 1  |   | No. | Breed         | Age  | Synovial structure               | Cause of septic synovitis/Diagnosis        | AAEP lameness | Serum SAA (mg/l) | Synovia macroscopic | Synovial WBC/ $\mu$ l | Synovial neutrophil % | Synovial TP g/dl | PCR pos/neg | LYS U/ml | MPO U/ml |
| 32 |   | 1   | Shire         | 3 y  | tarsocrural joint R              | control after successful tx of septic syn. | 2/5 RH        | nd               | red. visc, clear    | 197                   | 10                    |                  | pos.        | 430.62   | 0.092    |
| 33 |   | 2   | Warmblood     | 19 y | femoropatellar joint L           | Flare post intra-synovial treatment        | 2/5 LH        | 16.7             | red. visc., turbid  | 2560                  | 14                    |                  | pos.        | 228.11   | 0.086    |
| 34 |   | 3   | Warmblood     | 11 y | femoropatellar joint L           | Polyarthritis, control other joints        | 2/5 LH        | 556              |                     | 2600                  | 70                    |                  | neg.        | 381.71   | 0.086    |
| 35 |   | 4   | Warmblood     | 9 y  | digital flexor tendon sheath RH  | Chronic digital flexor tenosynovitis       | 2/5 RH        | nd               | clear, red. visc.   |                       |                       |                  | nd          | 0.00     | 0.089    |
| 36 |   | 5   | Quarter Horse | 11 y | tarsal sheath L                  | Thoroughpin                                | 2/5 LH        | nd               | clear, red. visc.   |                       |                       |                  | neg.        | 98.59    | 0.086    |
| 37 |   | 6   | Warmblood     | 11 y | tarsocrural joint L              | control after successful tx of septic syn. | 2/5 LH        | 994              | clear, physiol visc | 760                   | 44                    | 1.6              | neg.        | 150.78   | 0.086    |
| 38 |   | 7   | Warmblood     | 12 y | tarsometatarsal joint R          | Bone spavin bilateral                      | 2/5 RH        | nd               | clear, physiol visc |                       |                       |                  | neg.        | 47.09    | 0.088    |
| 39 |   | 8   | Warmblood     | 11 y | distal inter-phalangeal joint LF | Proximal suspensory desmitis LF            | 2/5 LF        | nd               | clear, physiol visc |                       |                       |                  | pos.        | 76.63    | 0.091    |
| 40 |   | 9   | Warmblood     | 3 y  | femoropatellar joint L           | control after successful tx of septic syn. | 1/5 LH        | nd               | clear, physiol visc |                       |                       |                  | neg.        | 137.87   | 0.086    |
| 41 |   | 10  | Frisian       | 5 y  | distal inter-phalangeal joint    | OA of the distal interphalangeal joint     | 3/5 LF        | 26.2             | clear, red. visc.   |                       |                       |                  | nd          | 67.96    | 0.770    |
| 42 |   | 11  | Warmblood     | 15 y | distal inter-phalangeal joint LH | Laceration without joint penetration       | 2/5 LH        | 13.2             | clear, physiol visc | ~700                  | 10                    |                  | nd          | 210.74   | 0.086    |
| 43 |   | 12  | Warmblood     | 11 y | digital flexor tendon sheath RF  | Chronic tenosynovitis DFTS                 | 1/5 RF        | nd               | clear, physiol visc |                       |                       |                  | neg.        | 47.50    | 0.125    |
| 44 |   | 13  | Thoroughbred  | 10 y | tarsocrural joint L              | Aseptic tarsocrural synovitis              | 1/5 LH        | <10              | hemor.              | 1080                  | <5                    | 3                | pos.        | 160.28   | 0.086    |
| 45 |   | 14  | Thoroughbred  | 10 y | tarsocrural joint L              | Aseptic tarsocrural synovitis              | 0/5           | nd               | clear, red. visc.   |                       |                       |                  | pos.        | 187.62   | 0.115    |
| 46 |   | 15  | Warmblood     | 6 y  | tarsocrural joint R              | Fracture med. malleolus                    | 0/5           | <10              | hemor.              | 170                   | 15                    | 3.5              | pos.        | 195.20   | 0.110    |
| 47 |   | 16  | Warmblood     | 6 y  | tarsocrural joint R              | Fracture med. malleolus                    | 1/5 RH        | <10              | orange, min. turbid | 5970                  | 59                    | 3.6              | pos.        | 740.16   | 0.105    |

Aseptic Synovitis Group

|    | A | B   | C             | D    | E                            | F                                          | G             | H                | I                      | J                     | K                     | L                | M           | N        | O        |
|----|---|-----|---------------|------|------------------------------|--------------------------------------------|---------------|------------------|------------------------|-----------------------|-----------------------|------------------|-------------|----------|----------|
| 1  |   | No. | Breed         | Age  | Synovial structure           | Cause of septic synovitis/Diagnosis        | AAEP lameness | Serum SAA (mg/l) | Synovia macroscopic    | Synovial WBC/ $\mu$ l | Synovial neutrophil % | Synovial TP g/dl | PCR pos/neg | LYS U/ml | MPO U/ml |
| 48 |   | 17  | Haflinger     | 2 y  | femoropatellar joint L       | Bilateral hindlimb/back pain               | 3/5 LH/RH     | <10              | clear, physiol visc    | 710                   | <5                    | 3.4              | nd          | 23.81    | 0.086    |
| 49 |   | 18  | Haflinger     | 3 y  | femoropatellar joint R       | Bilateral hindlimb/back pain               | 3/5 LH/RH     | <10              | clear, physiol visc    | 792                   | <5                    | 3.8              | nd          | 171.95   | 0.086    |
| 50 |   | 19  | Gidran        | 9 y  | metacarpophalangeal joint R  | Aseptic R metacarpophalangeal svnovitis    | 2/5 RF        | nd               | clear, physiol visc    |                       |                       |                  | nd          | 54.69    | 0.093    |
| 51 |   | 20  | Warmblood     | 12 y | tarsocural joint L           | DIRT-OCD L, prox. susp. desmitis RH        | 3/5 LH/RH     | <10              | clear, physiol visc    |                       |                       |                  | neg.        | 73.44    | 0.086    |
| 52 |   | 21  | Haflinger     | 20 y | antebrachiocarpal joint L    | OA of the antebrachiocarpal joint L        | 2/5 LF        | nd               | clear, physiol visc    |                       |                       |                  | nd          | 0.00     | 0.468    |
| 53 |   | 22  | Standardbred  | 10 y | tarsocural joint R           | control after successful tx of septic syn. | 1/5 RH        | nd               | red. visc., min turbid | 1060                  | 61                    | 3.6              | pos.        | 460.48   | 0.086    |
| 54 |   | 23  | Warmblood     | 17 y | metacarpophalangeal joint R  | OA R metacarpophalangeal joint             | 2/5 LF        | nd               | clear, physiol visc    |                       |                       |                  | nd          | 4.92     | 0.000    |
| 55 |   | 24  | PRE           | 21 y | femoropatellar joint L       | OA femoropatellar joint                    | 3/5 LH        | 230.4            | hemor.                 | ~1500                 | 65                    | 3.6              | pos.        | 426.52   | 0.378    |
| 56 |   | 25  | Warmblood     | 14 y | metatarso-phalangeal joint L | OA metatarso-phalangeal joint L            | 2/5 LH        | nd               |                        |                       |                       |                  | nd          | 127.43   | 0.136    |
| 57 |   | 26  | Quarter Horse | 10 y | tarsocural joint R           | Laceration without joint penetration       | 3/5 RH        | 878              | clear, physiol visc    | 180                   | <5                    |                  | neg.        | 29.98    | 0.000    |
| 58 |   | 27  | Warmblood     | 15 y | tarsometatarsal joint R      | Bilateral bone spavin                      | 2/5 RH        | nd               | clear, physiol visc    |                       |                       |                  | nd          | 0.00     | 0.144    |

|    | A             | B   | C               | D    | E                         | F                                   | G             | H                | I                   | J                     | K                     | L                | M           | N        | O        |
|----|---------------|-----|-----------------|------|---------------------------|-------------------------------------|---------------|------------------|---------------------|-----------------------|-----------------------|------------------|-------------|----------|----------|
| 1  |               | No. | Breed           | Age  | Synovial structure        | Cause of septic synovitis/Diagnosis | AAEP lameness | Serum SAA (mg/l) | Synovia macroscopic | Synovial WBC/ $\mu$ l | Synovial neutrophil % | Synovial TP g/dl | PCR pos/neg | LYS U/ml | MPO U/ml |
| 59 | Control group | 1   | Warmblood       | 4 y  | tarsocrural joint         | Chronic renal failure               |               |                  | clear, physiol visc |                       |                       |                  | neg.        | 63.09    | 0.086    |
| 60 |               | 2   | Frisian         | 16 y | antebrachiocarpal joint   | Degenerative suspensory desmitis    |               |                  | clear, physiol visc |                       |                       |                  | neg.        | 30.03    | 0.086    |
| 61 |               | 3   | Frisian         | 10 y | metacarpophalangeal joint | Intoxication                        |               |                  | clear, physiol visc |                       |                       |                  | neg.        | 42.67    | 0.090    |
| 62 |               | 4   | Warmblood       | 10 y | antebrachiocarpal joint   | Vertebral fracture                  |               |                  | clear, physiol visc |                       |                       |                  | neg.        | 140.24   | 0.086    |
| 63 |               | 5   | Icelandic Horse | 15 y | antebrachiocarpal joint   | Colic                               |               |                  | clear, physiol visc |                       |                       |                  | neg.        | 65.58    | 0.086    |
| 64 |               | 6   | Draft           | 17 y | antebrachiocarpal joint   | Colic                               |               |                  | clear, physiol visc |                       |                       |                  | neg.        | 131.95   | 0.086    |
| 65 |               | 7   | Warmblood       | 18 y | antebrachiocarpal joint   | Colic                               |               |                  | clear, physiol visc |                       |                       |                  | neg.        | 206.62   | 0.086    |
| 66 |               | 8   | Thoroughbred    | 15 y | metacarpophalangeal joint | Lacerations                         |               |                  | clear, physiol visc |                       |                       |                  | neg.        | 66.17    | 0.101    |
| 67 |               | 9   | Warmblood       | 15 y | antebrachiocarpal joint   | Sepsis                              |               |                  | clear, physiol visc |                       |                       |                  | neg.        | 131.95   | 0.086    |
| 68 |               | 10  | Arabian         | 25 y | metacarpophalangeal joint | Colic                               |               |                  | clear, physiol visc |                       |                       |                  | neg.        | 46.87    | 0        |

**Table S1:** The age (in years (y) and days (d)) of the included horses, the sampled synovial structure, the cause of septic synovitis respectively diagnosis, the American Association of Equine Practitioners (AAEP) lameness scale, serum amyloid A (SAA), macroscopic characteristics of the synovial fluid, synovial leukocyte (WBC) count, percentage (%) of neutrophils in the synovial fluid, synovial total protein (TP), PCR and the measured synovial lysozyme (LYS) and myeloperoxidase (MPO) activities are detailed for each of 3 groups (control, aseptic inflammatory and septic synovitis). Abbreviations: hemat....haematogenous, hemor....haemorrhagic, min....minimal, nd...not done, neg....negative, OA...osteoarthritis, OCD....osteocondrosis dissecans, pos....positive, red....reduced, visc....viscosity, syn....synovitis, WBC\* intracellular cocci detected in cytology
