# Supplementary material for: Detection of synovial sepsis in horses using enzymes as biomarkers
Source: PubMed Central journal article supplement — Equine Vet J. 2021 Jun 15;54(3):513–22. doi: 10.1111/evj.13459 (PMC9290786; doi:10.1111/evj.13459), 2021-06-15

Figure S1: QQ-plots of the data (Fig S1A and C) and residuals (Fig S1B and D) for lysozyme (LYS, Fig S1A and B) and myeloperoxidase (MPO, Fig S1C and D). The data were log-transformed after adding 20, in the case of lysozyme, or one, in the case of MPO. The line represents a perfect fit to the quantile points, given a normal distribution as reference.

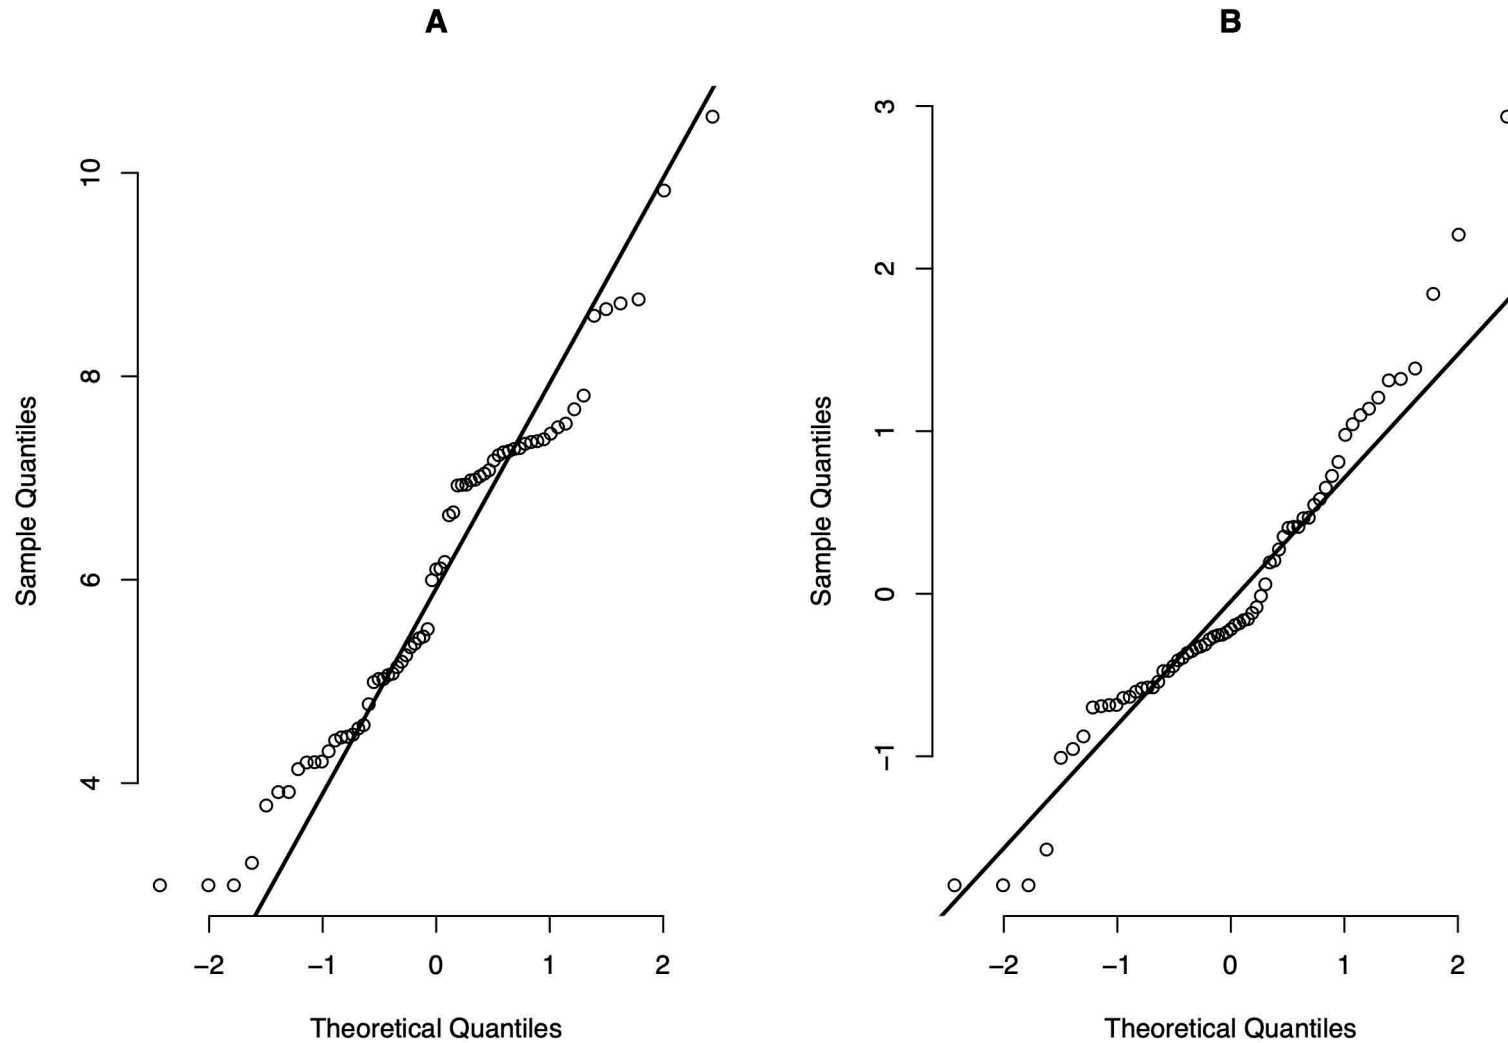

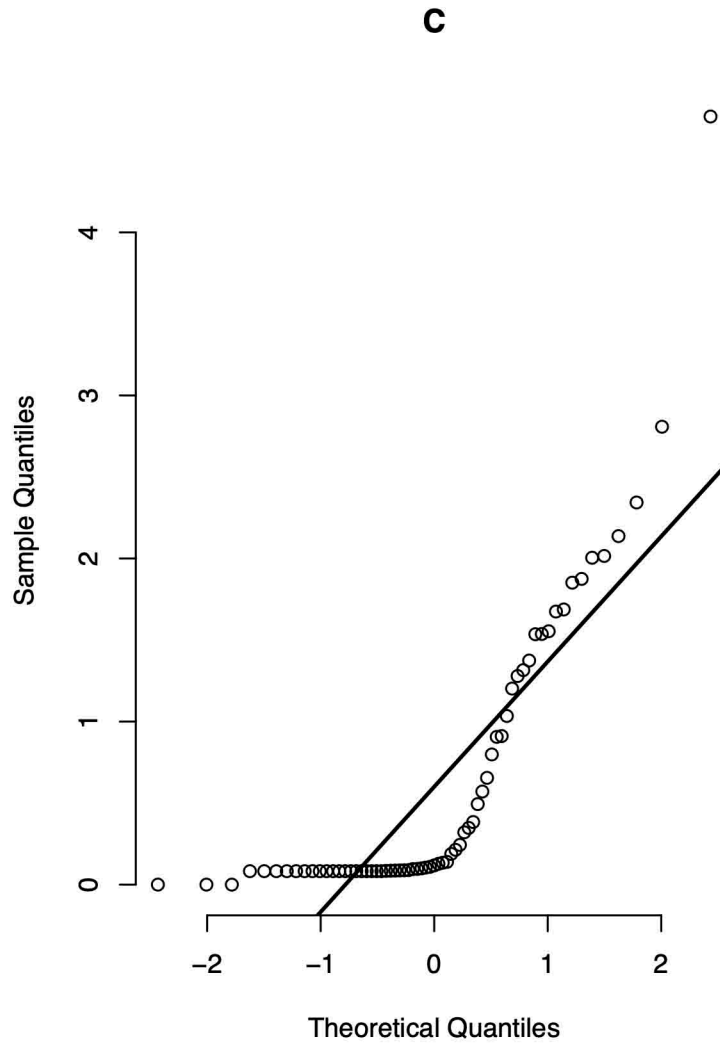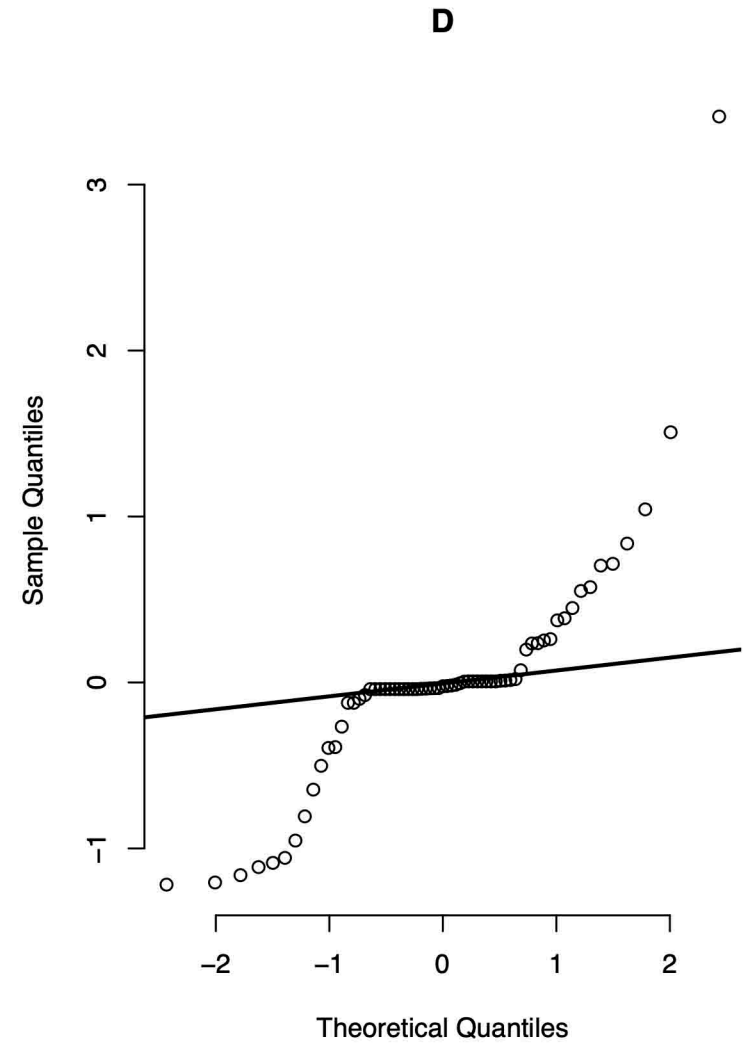

Supplement: EVJ-54-513-s002.pdf [file EVJ-54-513-s002.pdf]
