# Supplementary material for: Detection of synovial sepsis in horses using enzymes as biomarkers
Source: PubMed Central journal article supplement — Equine Vet J. 2021 Jun 15;54(3):513–22. doi: 10.1111/evj.13459 (PMC9290786; doi:10.1111/evj.13459), 2021-06-15
Supplement: EVJ-54-513-s003.pdf [file EVJ-54-513-s003.pdf]

**Table S2:** see legend below

|                                                      | cut-off value         | Sensitivity (%) (95% CI) | Specificity (%) (95% CI) | Likelihood ratio |
|------------------------------------------------------|-----------------------|--------------------------|--------------------------|------------------|
| Percentage of synovial neutrophils: aseptic - septic | > 29.50               | 100 (88.3 - 100.0)       | 53.85 (29.14 - 76.79)    | 2.167            |
|                                                      | > 51.50               | 96.55 (82.82 - 99.82)    | 61.54 (35.52 - 82.29)    | 2.51             |
|                                                      | > 60.00               | 96.55 (82.82 - 99.82)    | 69.23 (42.37 - 87.32)    | 3.138            |
|                                                      | > 63.00               | 96.55 (82.82 - 99.82)    | 84.62 (57.77 - 97.27)    | 6.276            |
|                                                      | > 67.50               | 96.55 (82.82 - 99.82)    | 92.31 (66.69 - 99.61)    | 12.55            |
|                                                      | > 76.00               | 96.55 (82.82 - 99.82)    | 100 (77.19 - 100.0)      |                  |
| Synovial leukocyte count: aseptic- septic            | > 896.0               | 100 (88.30 - 100)        | 38.46 (17.71 - 64.48)    | 1.625            |
|                                                      | > 1030                | 96.55 (82.82 - 99.82)    | 46.15 (23.21 - 70.86)    | 1.793            |
|                                                      | > 1070                | 96.55 (82.82 - 99.82)    | 53.85 (29.14 - 76.79)    | 2.092            |
|                                                      | > 1290                | 96.55 (82.82 - 99.82)    | 61.54 (35.52 - 82.29)    | 2.51             |
|                                                      | > 2030                | 96.55 (82.82 - 99.82)    | 69.23 (42.37 - 87.32)    | 3.138            |
|                                                      | > 2580                | 96.55 (82.82 - 99.82)    | 76.92 (49.74 - 91.82)    | 4.184            |
|                                                      | > 2800                | 96.55 (82.82 - 99.82)    | 84.62 (57.77 - 97.27)    | 6.276            |
|                                                      | > 3435                | 93.1 (78.04 - 98.77)     | 84.62 (57.77 - 97.27)    | 6.052            |
|                                                      | > 4920                | 89.66 (73.61 - 96.42)    | 84.62 (57.77 - 97.27)    | 5.828            |
|                                                      | > 5985                | 89.66 (73.61 - 96.42)    | 92.31 (66.69 - 99.61)    | 11.66            |
|                                                      | > 6470                | 86.21 (69.44 - 94.50)    | 92.31 (66.69 - 99.61)    | 11.21            |
|                                                      | > 6970                | 82.76 (65.45 - 92.40)    | 92.31 (66.69 - 99.61)    | 10.76            |
|                                                      | > 8000                | 79.31 (61.61 - 90.15)    | 92.31 (66.69 - 99.61)    | 10.31            |
|                                                      | > 9300                | 75.86 (57.89 - 87.78)    | 92.31 (66.69 - 99.61)    | 9.862            |
|                                                      | > 9800                | 72.41 (54.28 - 85.30)    | 92.31 (66.69 - 99.61)    | 9.414            |
|                                                      | > 10745               | 68.97 (50.77 - 82.72)    | 92.31 (66.69 - 99.61)    | 8.966            |
|                                                      | > 12745               | 65.52 (47.35 - 80.06)    | 92.31 (66.69 - 99.61)    | 8.517            |
| > 14500                                              | 65.52 (47.35 - 80.06) | 100 (77.19 - 100.0)      |                          |                  |

**Table S2:** The cut-off values for the percentage of synovial neutrophils and the synovial leukocyte count to distinguish between aseptic and septic synovitis and for lysozyme and myeloperoxidase to differentiate between control, aseptic and septic synovitis were calculated using the receiver operating characteristic curve (ROC) method. The cut-off values ranging from the best specificity with maximum (100% or highest achieved value) sensitivity to the best sensitivity with maximum (100% or highest achieved value) specificity are detailed with the corresponding sensitivity and specificity values, including 95% confidence intervals (CI) and likelihood ratios (for specificities <100) for all ROC curve calculations which did not yield a cut-off value with 100% sensitivity and specificity.

|                                    | <b>cut-off value</b>  | <b>Sensitivity (%) (95% CI)</b> | <b>Specificity (%) (95% CI)</b> | <b>Likelihood ratio</b> |
|------------------------------------|-----------------------|---------------------------------|---------------------------------|-------------------------|
| <b>Lysozyme: control - aseptic</b> | > 2.458               | 88.89 (71.94 - 96.15)           | 0 (0.000 - 27.75)               | 0.8889                  |
|                                    | > 14.36               | 85.19 (67.52 - 94.08)           | 0 (0.000 - 27.75)               | 0.8519                  |
|                                    | > 26.90               | 81.48 (63.30 - 91.82)           | 0 (0.000 - 27.75)               | 0.8148                  |
|                                    | > 30.01               | 77.78 (59.24 - 89.39)           | 0 (0.000 - 27.75)               | 0.7778                  |
|                                    | > 36.35               | 77.78 (59.24 - 89.39)           | 10 (0.5129 - 40.42)             | 0.8642                  |
|                                    | > 44.77               | 77.78 (59.24 - 89.39)           | 20 (3.554 - 50.98)              | 0.9722                  |
|                                    | > 46.98               | 77.78 (59.24 - 89.39)           | 30 (10.78 - 60.32)              | 1.111                   |
|                                    | > 47.30               | 74.07 (55.32 - 86.83)           | 30 (10.78 - 60.32)              | 1.058                   |
|                                    | > 51.09               | 70.37 (51.52 - 84.15)           | 30 (10.78 - 60.32)              | 1.005                   |
|                                    | > 58.89               | 66.67 (47.82 - 81.36)           | 30 (10.78 - 60.32)              | 0.9524                  |
|                                    | > 64.33               | 66.67 (47.82 - 81.36)           | 40 (16.82 - 68.73)              | 1.111                   |
|                                    | > 65.87               | 66.67 (47.82 - 81.36)           | 50 (23.66 - 76.34)              | 1.333                   |
|                                    | > 67.07               | 66.67 (47.82 - 81.36)           | 60 (31.27 - 83.18)              | 1.667                   |
|                                    | > 70.70               | 62.96 (44.23 - 78.47)           | 60 (31.27 - 83.18)              | 1.574                   |
|                                    | > 75.04               | 59.26 (40.73 - 75.49)           | 60 (31.27 - 83.18)              | 1.481                   |
|                                    | > 87.61               | 55.56 (37.31 - 72.41)           | 60 (31.27 - 83.18)              | 1.389                   |
|                                    | > 113.0               | 51.85 (33.99 - 69.26)           | 60 (31.27 - 83.18)              | 1.296                   |
|                                    | > 129.7               | 48.15 (30.74 - 66.01)           | 60 (31.27 - 83.18)              | 1.204                   |
|                                    | > 134.9               | 48.15 (30.74 - 66.01)           | 80 (49.02 - 96.45)              | 2.407                   |
|                                    | > 139.1               | 44.44 (27.59 - 62.69)           | 80 (49.02 - 96.45)              | 2.222                   |
|                                    | > 145.5               | 44.44 (27.59 - 62.69)           | 90 (59.58 - 99.49)              | 4.444                   |
|                                    | > 155.5               | 40.74 (24.51 - 59.27)           | 90 (59.58 - 99.49)              | 4.074                   |
|                                    | > 166.1               | 37.04 (21.53 - 55.77)           | 90 (59.58 - 99.49)              | 3.704                   |
|                                    | > 179.8               | 33.33 (18.64 - 52.18)           | 90 (59.58 - 99.49)              | 3.333                   |
| > 191.4                            | 29.63 (15.85 - 48.48) | 90 (59.58 - 99.49)              | 2.963                           |                         |
| > 200.9                            | 25.93 (13.17 - 44.68) | 90 (59.58 - 99.49)              | 2.593                           |                         |
| > 208.7                            | 25.93 (13.17 - 44.68) | 100 (72.25 - 100.0)             |                                 |                         |

|                                               | <b>cut-off value</b> | <b>Sensitivity (%) (95% CI)</b> | <b>Specificity (%) (95% CI)</b> | <b>Likelihood ratio</b> |
|-----------------------------------------------|----------------------|---------------------------------|---------------------------------|-------------------------|
| <b>Myeloperoxidase:<br/>control - aseptic</b> | > 0.04300            | 92.59 (76.63 -98.68)            | 10 (0.5129 -40.42)              | 1.029                   |
|                                               | > 0.08700            | 51.85 (33.99 -69.26)            | 80 (49.02 -96.45)               | 2.593                   |
|                                               | > 0.08850            | 48.15 (30.74 -66.01)            | 80 (49.02 -96.45)               | 2.407                   |
|                                               | > 0.08950            | 44.44 (27.59 -62.69)            | 80 (49.02 -96.45)               | 2.222                   |
|                                               | > 0.09050            | 44.44 (27.59 -62.69)            | 90 (59.58 -99.49)               | 4.444                   |
|                                               | > 0.09150            | 40.74 (24.51 -59.27)            | 90 (59.58 -99.49)               | 4.074                   |
|                                               | > 0.09250            | 37.04 (21.53 -55.77)            | 90 (59.58 -99.49)               | 3.704                   |
|                                               | > 0.09700            | 33.33 (18.64 -52.18)            | 90 (59.58 -99.49)               | 3.333                   |
|                                               | > 0.1029             | 33.33 (18.64 -52.18)            | 100 (72.25 -100.0)              |                         |
| <b>Myeloperoxidase:<br/>control - septic</b>  | > 0.04300            | 100 (88.65 -100.0)              | 10 (0.5129 -40.42)              | 1.111                   |
|                                               | > 0.08800            | 96.67 (83.33 -99.83)            | 80 (49.02 -96.45)               | 4.833                   |
|                                               | > 0.09500            | 96.67 (83.33 -99.83)            | 90 (59.58 -99.49)               | 9.667                   |
|                                               | > 0.1005             | 93.33 (78.68 -98.82)            | 90 (59.58 -99.49)               | 9.333                   |
|                                               | > 0.1254             | 93.33 (78.68 -98.82)            | 100 (72.25 -100.0)              |                         |
| <b>Myeloperoxidase: aseptic - septic</b>      | > 0.1305             | 93.33 (78.68 -98.82)            | 81.48 (63.30 -91.82)            | 5.04                    |
|                                               | > 0.1399             | 93.33 (78.68 -98.82)            | 85.19 (67.52 -94.08)            | 6.3                     |
|                                               | > 0.1467             | 93.33 (78.68 -98.82)            | 88.89 (71.94 -96.15)            | 8.4                     |
|                                               | > 0.1784             | 90 (74.38 -96.54)               | 88.89 (71.94 -96.15)            | 8.1                     |
|                                               | > 0.2225             | 86.67 (70.32 -94.69)            | 88.89 (71.94 -96.15)            | 7.8                     |
|                                               | > 0.2570             | 83.33 (66.44 -92.66)            | 88.89 (71.94 -96.15)            | 7.5                     |
|                                               | > 0.3270             | 80 (62.69 -90.49)               | 88.89 (71.94 -96.15)            | 7.2                     |
|                                               | > 0.3970             | 80 (62.69 -90.49)               | 92.59 (76.63 -98.68)            | 10.8                    |
|                                               | > 0.4420             | 76.67 (59.07 -88.21)            | 92.59 (76.63 -98.68)            | 10.35                   |
|                                               | > 0.5533             | 76.67 (59.07 -88.21)            | 96.3 (81.72 -99.81)             | 20.7                    |
|                                               | > 0.7043             | 73.33 (55.55 -85.82)            | 96.3 (81.72 -99.81)             | 19.8                    |
|                                               | > 0.8475             | 73.33 (55.55 -85.82)            | 100 (87.54 -100.0)              |                         |
