# Supplementary material for: Detection of synovial sepsis in horses using enzymes as biomarkers
Source: PubMed Central journal article supplement — Equine Vet J. 2021 Jun 15;54(3):513–22. doi: 10.1111/evj.13459 (PMC9290786; doi:10.1111/evj.13459), 2021-06-15

**Figure S2:** The ROC curves illustrating the trade-off between high sensitivity and high specificity when discriminating between clinically normal (control) and septic, aseptic and septic, respectively, control, and aseptic laboratory values for lysozyme and myeloperoxidase are shown. For the synovial leukocyte count and the percentage of synovial neutrophils, the ROC curves illustrating the discrimination threshold between aseptic and septic samples are depicted.

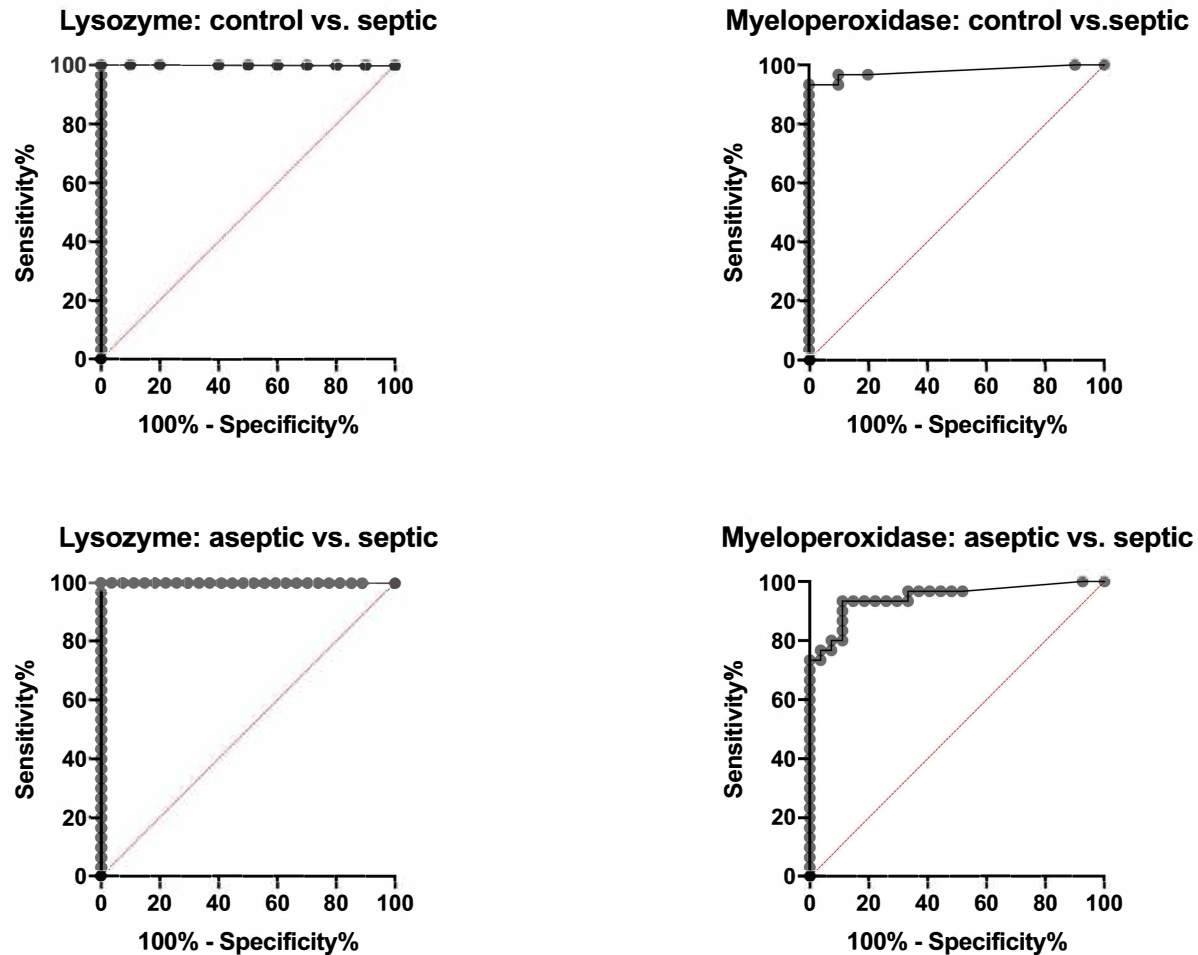

**Lysozyme: control vs. aseptic**

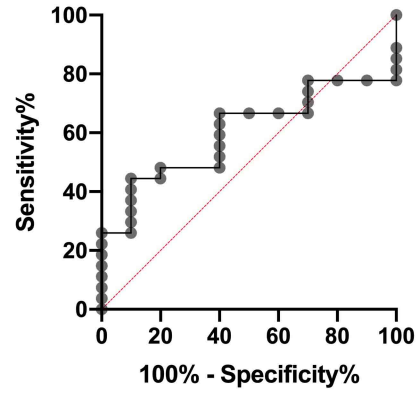

**Myeloperoxidase: control vs. aseptic**

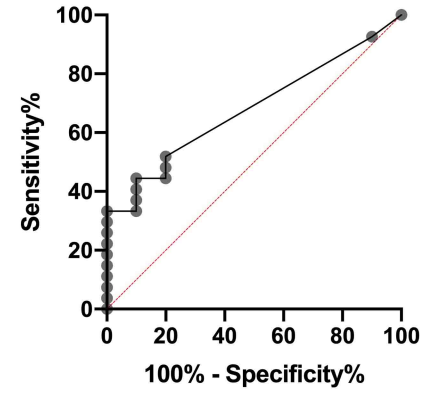

**Synovial leukocyte count:  
aseptic vs. septic**

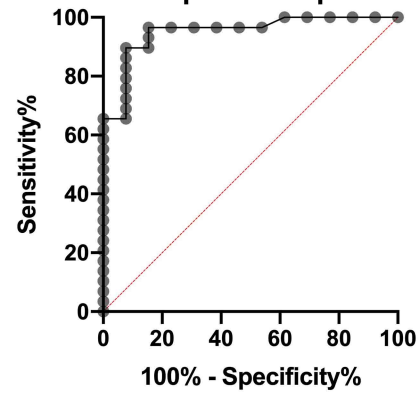

**Percentage synovial neutrophils:  
aseptic vs. septic**

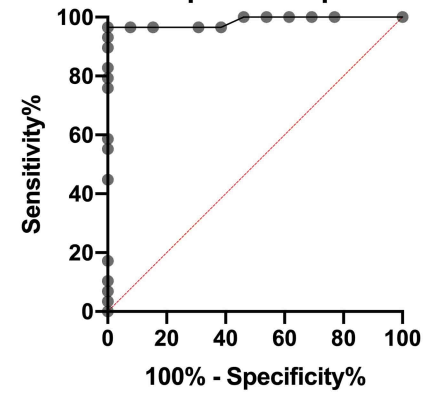

Supplement: EVJ-54-513-s004.pdf [file EVJ-54-513-s004.pdf]
